# Supplementary material for: ZIP4 Is a Novel Cancer Stem Cell Marker in High-Grade Serous Ovarian Cancer
Source: PubMed Central journal article supplement (PMC7764492; doi:10.3390/cancers12123692), 2020-12-09
Supplement: cancers-12-03692-s001.pdf [file cancers-12-03692-s001.pdf]

# Supplementary Materials: ZIP4 Is a Novel Cancer Stem Cell Marker in High-Grade Serous Ovarian Cancer

Qipeng Fan, Wen Zhang, Robert E. Emerson and Yan Xu

## Tumors formed from Patient-Derived Xenograft model

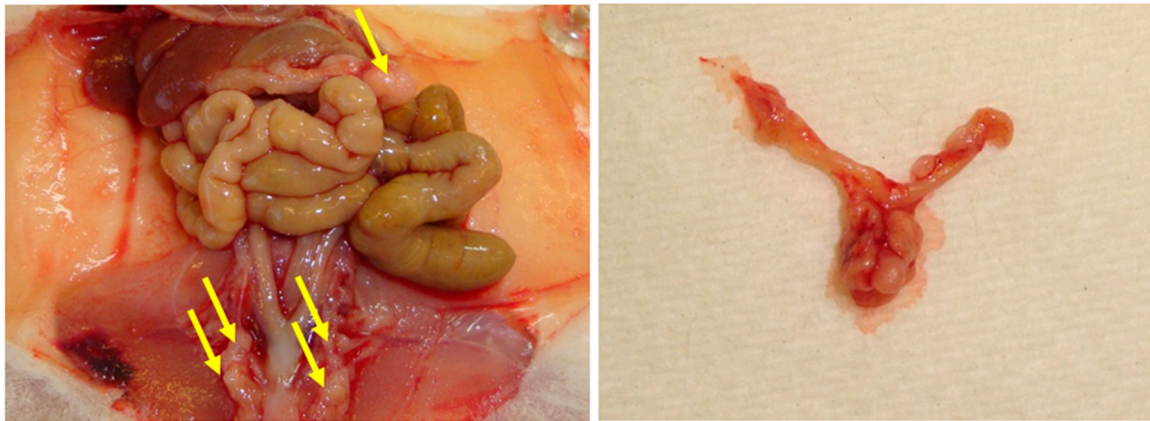

Figure S1. Representative photographs of tumors formed in Patient-Derived Xenograft model.

Figure 1

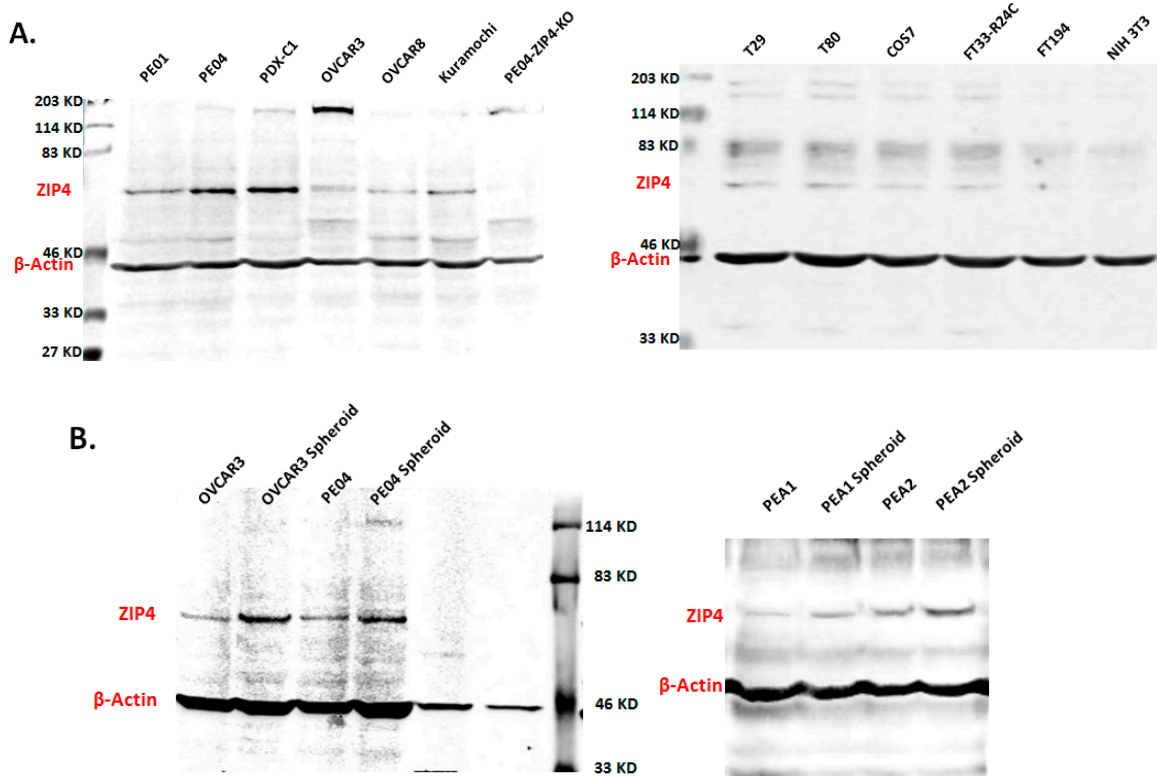

Figure 5

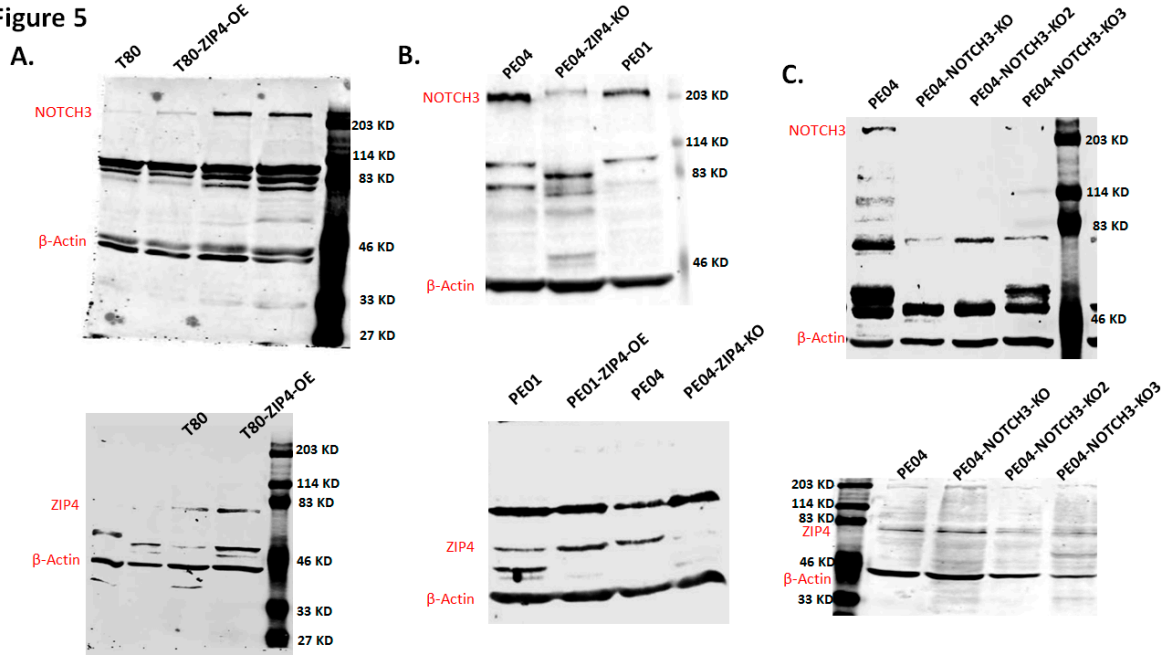

Figure 6

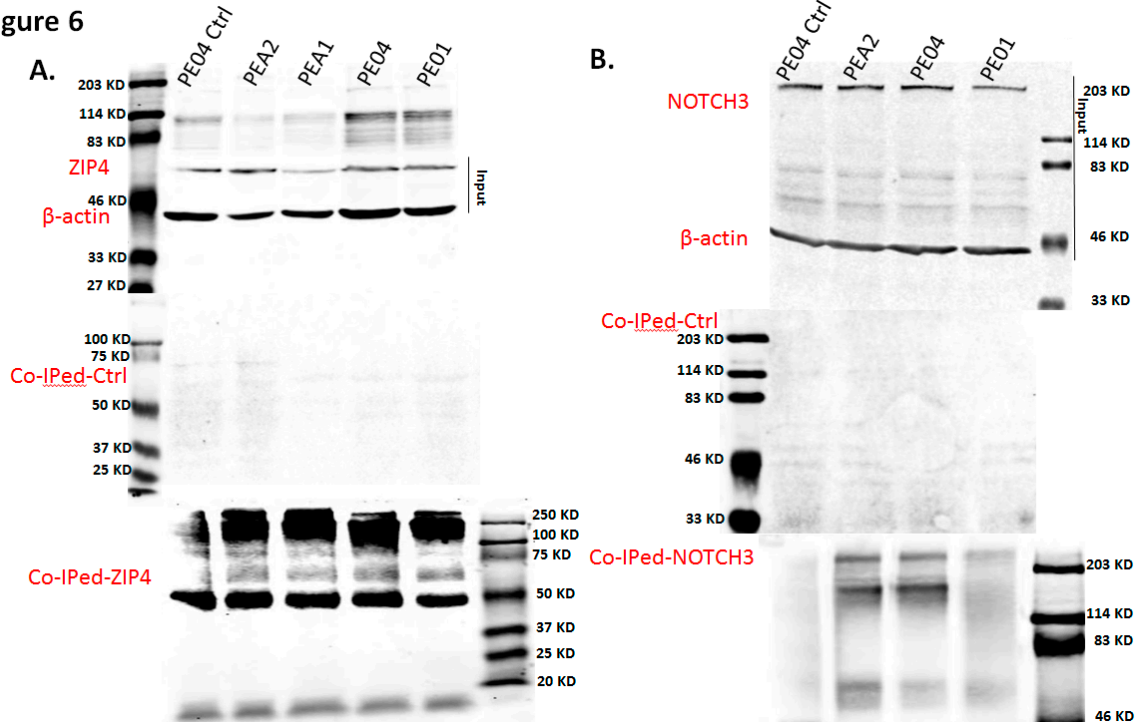

Figure S2. Uncropped Western blots. The Western blots showing all the bands with molecular weight markers for Figs 1, 5, and 6.

**Publisher's Note:** MDPI stays neutral with regard to jurisdictional claims in published maps and institutional affiliations.

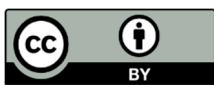

© 2020 by the authors. Licensee MDPI, Basel, Switzerland. This article is an open access article distributed under the terms and conditions of the Creative Commons Attribution (CC BY) license (<http://creativecommons.org/licenses/by/4.0/>).
